# Supplementary material for: India consists of multiple food systems with scoioeconomic and environmental variations
Source: PubMed Central journal article supplement (PMC9416984; doi:10.1371/journal.pone.0270342), 2022-08-26

India consists of multiple food systems with socioeconomic and environmental variations

## S1 Appendix

### S1 Equation.

$$C_a = C \times \frac{M_h + M_f}{M_h + M_g}$$

Here,  $C_a$  denotes the adjusted calorie intake of the household.  $C$  represents the estimated calorie intake based on the HCES data.  $M_h$  is a number of meals consumed by the household members in the house or received through purchase or as assistance or payment (excluding meals received from other households).  $M_g$  denotes the number of meals consumed by non-members (e.g., guests, employees).  $M_f$  represents the number of meals received free from other households.

**S1 Table. Consumer Unit.**

| Sex    | No. of Consumer units assigned |      |      |      |       |       |       |       |       |       |       |      |
|--------|--------------------------------|------|------|------|-------|-------|-------|-------|-------|-------|-------|------|
|        | Age in completed years         |      |      |      |       |       |       |       |       |       |       |      |
|        | <1                             | 1-3  | 4-6  | 7-9  | 10-12 | 13-15 | 16-19 | 20-39 | 40-49 | 50-59 | 60-69 | 70 + |
| Male   | 0.43                           | 0.54 | 0.72 | 0.87 | 1.03  | 0.97  | 1.02  | 1.00  | 0.95  | 0.90  | 0.80  | 0.70 |
| Female | 0.43                           | 0.54 | 0.72 | 0.87 | 0.93  | 0.80  | 0.75  | 0.71  | 0.68  | 0.64  | 0.51  | 0.50 |

**S2 Table. Food Groups.**

| <b>Food Groups</b>      | <b>Food items in the data</b>                                                                                                                                                                                                                                                                                                                                                                                                                                                                                                                                                                                                                                                                                                                                                                                                                                                                                                                                                                                                                                                                                                                                                                                                                                                                                                             |
|-------------------------|-------------------------------------------------------------------------------------------------------------------------------------------------------------------------------------------------------------------------------------------------------------------------------------------------------------------------------------------------------------------------------------------------------------------------------------------------------------------------------------------------------------------------------------------------------------------------------------------------------------------------------------------------------------------------------------------------------------------------------------------------------------------------------------------------------------------------------------------------------------------------------------------------------------------------------------------------------------------------------------------------------------------------------------------------------------------------------------------------------------------------------------------------------------------------------------------------------------------------------------------------------------------------------------------------------------------------------------------|
| Cereals                 | Rice – PDS, Rice – other sources, Chira, Khoi, Kawa, Muri and other Rice products, Wheat/atta – PDS, Wheat/atta – other sources, Maida, Suji, Rawa, Sewai, Noodles, Bread (bakery) and other Wheat products, Jowar & Products, Bajra & Products, Maize & Products, Barley & Products, Small Millets & Products, Ragi & Products, Other Cereals                                                                                                                                                                                                                                                                                                                                                                                                                                                                                                                                                                                                                                                                                                                                                                                                                                                                                                                                                                                            |
| White Tubers and Roots  | Cereal substitutes (Tapioca, Jackfruit seed, etc., Potato (includes Sweet Potato and Green Plantain)                                                                                                                                                                                                                                                                                                                                                                                                                                                                                                                                                                                                                                                                                                                                                                                                                                                                                                                                                                                                                                                                                                                                                                                                                                      |
| Vegetables              | Onion, Tomato, Brinjal, Radish, Carrot, Palak/Other leafy vegetables, Chillis: green, Ladys finger, Parwal, Patal/Kundru, Cauliflower, Cabbage, Gourd, Pumpkin, Peas, Green, French beans, Barbate, Lemon, Other Vegetables (rural), Other Vegetables (urban)                                                                                                                                                                                                                                                                                                                                                                                                                                                                                                                                                                                                                                                                                                                                                                                                                                                                                                                                                                                                                                                                             |
| Fruits                  | Banana, Jackfruit, Watermelon, Pineapple, Coconut, Coconut: green, Guava, Singara, Orange, Mausami, Papaya, Mango, Kharbooza, Pears, Naspati, Berries, Leechi, Apple, Grapes, Other Fresh Fruits (rural), Other Fresh Fruits (urban)                                                                                                                                                                                                                                                                                                                                                                                                                                                                                                                                                                                                                                                                                                                                                                                                                                                                                                                                                                                                                                                                                                      |
| Meat                    | Chicken, Goat Meat/Mutton, Beef/ Buffalo Meat, Pork                                                                                                                                                                                                                                                                                                                                                                                                                                                                                                                                                                                                                                                                                                                                                                                                                                                                                                                                                                                                                                                                                                                                                                                                                                                                                       |
| Eggs                    | Eggs                                                                                                                                                                                                                                                                                                                                                                                                                                                                                                                                                                                                                                                                                                                                                                                                                                                                                                                                                                                                                                                                                                                                                                                                                                                                                                                                      |
| Fish and other seafood  | Fish, Prawn, Birds, Crab, Oyster, Tortoise etc.                                                                                                                                                                                                                                                                                                                                                                                                                                                                                                                                                                                                                                                                                                                                                                                                                                                                                                                                                                                                                                                                                                                                                                                                                                                                                           |
| Legumes, nuts and seeds | Arhar, Tur, Gram (split), Gram (whole), Moong, Masur, Urd, Peas, Khesari, Other Pulses, Gram Products, Besan, other pulse products, Baby food, Coconut, Copra, Groundnut, Dates, Cashewnut, Walnut, Other Nuts                                                                                                                                                                                                                                                                                                                                                                                                                                                                                                                                                                                                                                                                                                                                                                                                                                                                                                                                                                                                                                                                                                                            |
| Milk and milk products  | Milk: liquid, Milk: condensed/ powder, Curd, Ghee, Other Milk Products (rural), Other Milk Products (urban)                                                                                                                                                                                                                                                                                                                                                                                                                                                                                                                                                                                                                                                                                                                                                                                                                                                                                                                                                                                                                                                                                                                                                                                                                               |
| Sweets                  | Sugar – PDS, Sugar – other sources, Gur, Candy, Misri, Honey                                                                                                                                                                                                                                                                                                                                                                                                                                                                                                                                                                                                                                                                                                                                                                                                                                                                                                                                                                                                                                                                                                                                                                                                                                                                              |
| Oils and fats           | Vanaspati, Margarine, Mustard oil, Groundnut oil, Coconut oil, Refined oil Sunflower, Soyabean, Saffola, etc. Edible oil: Others                                                                                                                                                                                                                                                                                                                                                                                                                                                                                                                                                                                                                                                                                                                                                                                                                                                                                                                                                                                                                                                                                                                                                                                                          |
| Miscellaneous           | Ice-cream (rural), Ice-cream (urban), Cold Beverages: bottled/ canned, Fruit Juice and Shake, Other Beverages: Cocoa, Chocolate etc. (rural), Other Beverages: Cocoa, etc. (urban), Cooked Meals purchased, Cooked Meals received as assistance, Cooked Meals received free in workplace, Cooked Snacks purchased [Samosa, Puri, Paratha, Burger, Chowmein, Idli, Dosa, Vada, Chops, Pakoras, Pao bhaji, etc.] (rural), Cooked Snacks purchased [Samosa, Puri, Paratha, Burger, Chowmein, Idli, Dosa, Vada, Chops, Pakoras, Pao bhaji, etc.] (urban), Other served Processed Food (rural), Other Served Processed Food (urban), Cake, Pastry, Prepared Sweets (rural), Cake, Pastry, Prepared Sweets (urban), Biscuits, Chocolates (rural), Biscuits, Chocolates (urban), Papad, Bhujia, Namkeen, Mixture, Chanachur (rural), Papad, Bhujia, Namkeen, Mixture, Chanachur (urban), Chips, Pickles, Sauce, Jam, Jelly, Other packaged processed food (rural), Other packaged processed food (urban), Toddy, Country Liquor, Beer, Foreign/ Refined Liquor or Wine, Raisin, Kishmish, Monacca, etc. Other dry fruits, Ginger, Garlic, Jeera, Dhania, Turmeric, Black Pepper, Dry Chillies, Tamarind, Curry Powder, Oilseeds, Other Spices, Tea: Cups, Tea: Leaf, Coffee: Cups, Coffee: Powder, Pan: Leaf, Pan: Finished, Ingredients for Pan |

**S3 Table. Food Processing.**

| Food Category                   | Food items in the data                                                                                                                                                                                                                                                                                                                                                                                                                                                                                                                                                                                                                                                                                                                                                                                                                                                                                                                                                                           |
|---------------------------------|--------------------------------------------------------------------------------------------------------------------------------------------------------------------------------------------------------------------------------------------------------------------------------------------------------------------------------------------------------------------------------------------------------------------------------------------------------------------------------------------------------------------------------------------------------------------------------------------------------------------------------------------------------------------------------------------------------------------------------------------------------------------------------------------------------------------------------------------------------------------------------------------------------------------------------------------------------------------------------------------------|
| Processed and Ready to eat Food | Ice-cream (rural), Ice-cream (urban), Cold Beverages: bottled/canned, Fruit Juice and Shake, Other Beverages: Cocoa, Chocolate etc. (rural), Other Beverages: Cocoa, etc. (urban), Cooked Snacks purchased [Samosa, Puri, Paratha, Burger, Chowmein, Idli, Dosa, Vada, Chops, Pakoras, Pao bhaji, etc.] (rural), Cooked Snacks purchased [Samosa, Puri, Paratha, Burger, Chowmein, Idli, Dosa, Vada, Chops, Pakoras, Pao bhaji, etc.] (urban), Other Served Processed Food (rural), Other Served Processed Food (urban), Cake, Pastry, Prepared Sweets (rural), Cake, Pastry, Prepared Sweets (urban), Biscuits, Chocolates (rural), Biscuits, Chocolates (urban), Papad, Bhujia, Namkeen, Mixture, Chanachur (rural), Papad, Bhujia, Namkeen, Mixture, Chanachur (urban), Chips, Pickles, Sauce, Jam, Jelly, Other packaged processed food (rural), Other packaged processed food (urban), Cooked Meals Purchased, Cooked Meals received as assistance, Cooked Meals received free in workplace |

**S4 Table. Cluster Information.**

| Cluster Name | Size  | Size Percentage |
|--------------|-------|-----------------|
| $P_A$        | 8764  | 4.88            |
| $P_B$        | 12211 | 6.80            |
| $P_C$        | 17191 | 9.57            |
| $S_A$        | 25651 | 14.29           |
| $S_B$        | 11761 | 6.55            |
| $S_C$        | 16935 | 9.43            |
| $M_A$        | 33769 | 18.81           |
| $M_B$        | 34165 | 19              |
| $M_C$        | 2924  | 1.63            |
| $M_D$        | 16108 | 8.97            |

**S1 Fig. Selection of Indian Food systems.** Based on maximum average silhouette score, we select 10 clusters i.e. Indian food systems.

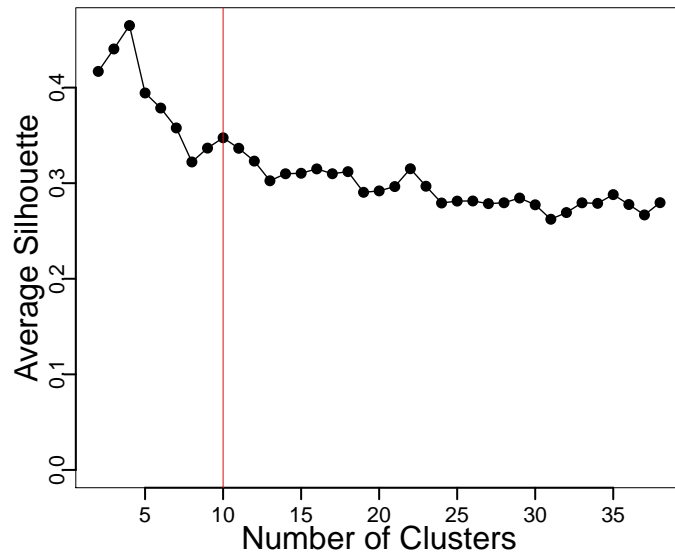

**S2 Fig. Three groups of Indian food systems- production-based food systems, subsidy-based food systems, and market-based food systems vary among 15 food system parameters.** Production, subsidy and market denotes calorie from home produced food, subsidised food, and market-purchased food. The abbreviations in the figure are- SIDD- Simpsons Index of Dietary Diversity, SIFPD- Simpsons Index of Food Production Diversity, GHG- greenhouse gases, WF- Water footprint, DPCE- Daily per capita income in USD PPP.

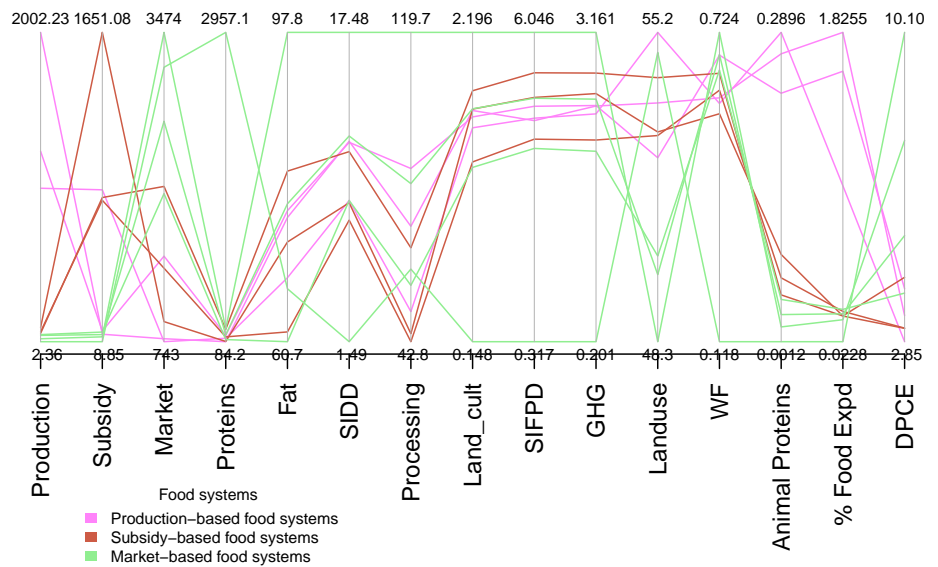

S3 Fig. State and Union Territories map of India.

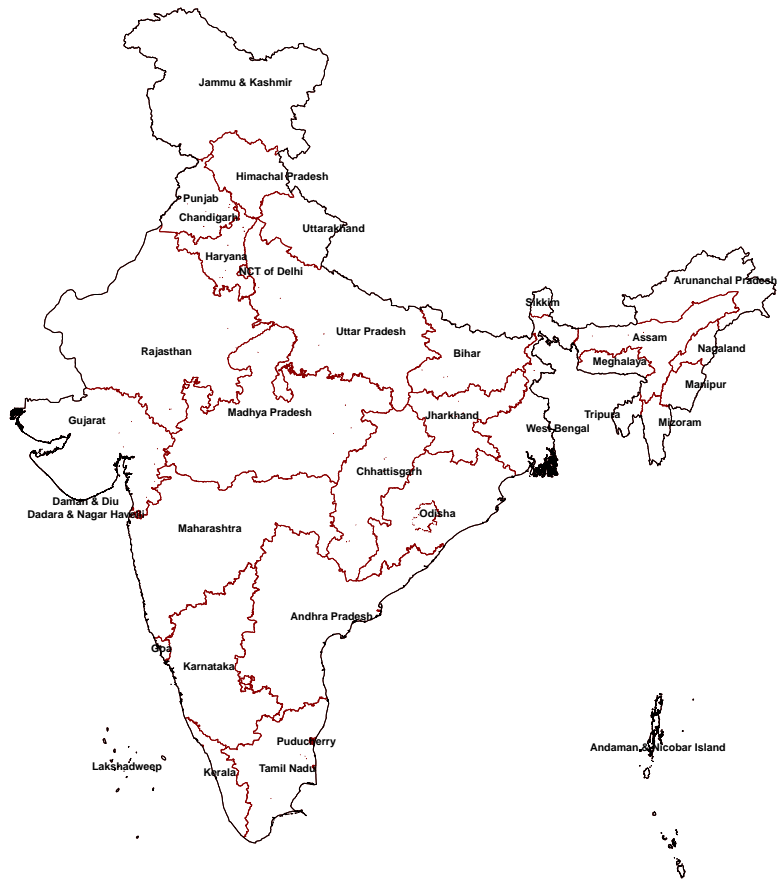

Supplement: pone.0270342.s001.pdf [file pone.0270342.s001.pdf]
